# Supplementary material for: Generation of C10H4 species in a low-temperature argon matrix: consecutive photolysis of 1,2;5,6-naphthalenetetracarboxylic dianhydride
Source: Royal Society of Chemistry journal article supplement (doi:10.1039/b002555k), 2000-01-01
Supplement: b002555k2.doc [file b002555k2.doc]

##### Supplementary Information

T. Sato, H. Niino, A. Yabe

“Generation of C10H4 species in a low-temperature argon matrix: Consecutive photolysis of 1,2;5,6-naphthalenetetracarboxylic dianhydride”

**Table 1.** Theoretically-estimated IR data of deca-5-ene-1,3,7,9-tetrayne (cis- and trans-comformer*a*)

Cis-confomer Trans-conformer

Symm. WavenumberIR intensity Symm. WavenumberIR intensity Character

/ cm-1 / km·mol-1 / cm-1 / km·mol-1

Ag 3355 0*b* A1 3356 120 str(C-H), sym.

Bu 3354 341 B2 3355 138 str(C-H), asym.

A1 3050 13 str(C-H), sym.

Bu 3047 17 B2 3036 5 str(C-H), asym.

A1 2209 4 str(CC), sym.

Bu 2088 9 B2 2088 6 str(CC), asym.

A1 2084 4 str(CC), sym.

A1 1556 9 def. in plane

Bu 1274 3 B2 1390 8 def. in plane

Bu 1197 1 B2 1176 2 bend(=C-H)

in plane.

Au 923 38 bend(=C-H)

out of plane.

B2 825 15 def. in plane.

B1 748 34 bend(=C-H)

out of plane

Au 706 10 def. out of plane.

Bu 706 10 def. in plane

Bu 660 8 B2 652 4 def. in plane

A1 640 5 def. in plane

Bu 587 95 B2 589 36 bend(C-H)

in plane.

A1 583 33 bend(C-H)

in plane.

Au 581 91 B1 581 97 bend(C-H)

out of plane.

B2 576 23 bend(C-H)

in plane.

Au 501 2 def. out of plane.

Bu 485 4 def. in plane.

Theoretical IR data were estimated at the B3LYP/6‑31G** level. The IR bands with intensities > 1 km·mol-1 were listed. Wavenumbers were scaled by 0.9614.  *a*C2h and C2v structure were adopted respectively. *b* symmetrically-forbidden C-H stretching mode.
